# Supplementary material
Source: PubMed Central journal article supplement (PMC2812611)

# Partitioning, dynamics, and orientation of lung surfactant peptide KL<sub>4</sub> in phospholipid bilayers

*Joanna R. Long, Frank D. Mills, Omjoy K. Ganesh, and R. Suzanne Farver*

Department of Biochemistry and Molecular Biology and McKnight Brain Institute, Box 100245, Gainesville, FL 32610-0245.

**Address correspondence to:** Dr. Joanna R. Long, Box 100245, Department of Biochemistry and Molecular Biology, University of Florida, Gainesville, FL 32610-0245  
Telephone: 352-846-1506, Fax: 352-392-3422. Corresponding author's email:  
[jrlong@mbi.ufl.edu](mailto:jrlong@mbi.ufl.edu)

## **Supplementary data**

First moment analyses of the <sup>2</sup>H spectra presented in the main article are provided in tabular and graphical form.

Spectra presented in the main article were symmetrized to improve S/N and clarity. In this file are comparisons of symmetrized data (symmetrical) to unsymmetrized data (complex). Additionally, signal intensities for residual <sup>2</sup>H<sub>2</sub>O in the center of the spectra were not plotted in the main article to improve the scale on which the spectra were plotted; all intensities are included in this file.

Spectral first moments for KL<sub>4</sub> in 3:1 POPC/POPG

| Label position | First Moment        |                     |                      |                      |                      |
|----------------|---------------------|---------------------|----------------------|----------------------|----------------------|
|                | -10 °C              | 0 °C                | 14 °C                | 25 °C                | 40 °C                |
| L3             | $11 \times 10^{-3}$ | $11 \times 10^{-3}$ | $7.5 \times 10^{-3}$ | $5.0 \times 10^{-3}$ | $3.5 \times 10^{-3}$ |
| L10            | 9.5                 | 8.7                 | 7.2                  | 6.9                  | 6.7                  |
| L12            | 9.8                 | 9.7                 | 7.2                  | 6.0                  | 4.3                  |
| L19            | 9.2                 | 8.4                 | 7.2                  | 6.0                  | 6.3                  |

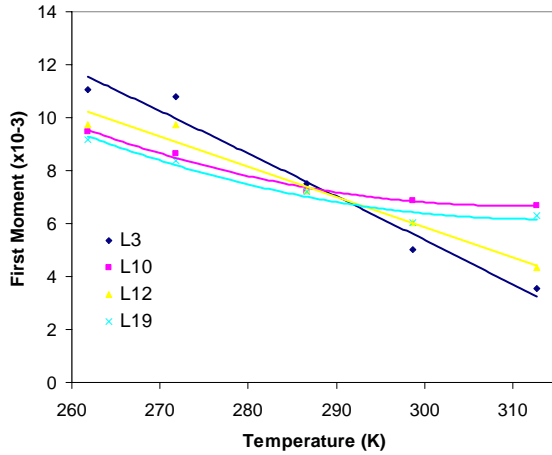

Spectral first moments for KL<sub>4</sub> in 4:1 DPPC/POPG

| Label position | First Moment         |                      |
|----------------|----------------------|----------------------|
|                | 25 °C                | 40 °C                |
| L3             | $7.6 \times 10^{-3}$ | $6.1 \times 10^{-3}$ |
| L10            | 7.8                  | 7.2                  |
| L12            | 6.6                  | 4.7                  |
| L19            | 7.1                  | 6.8                  |

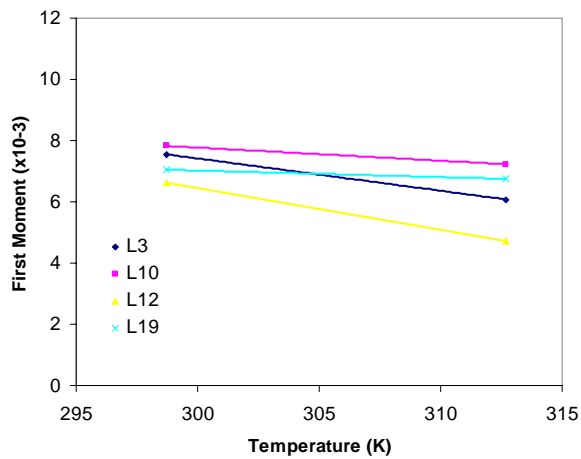

# DPPC/POPG Samples, 313 K

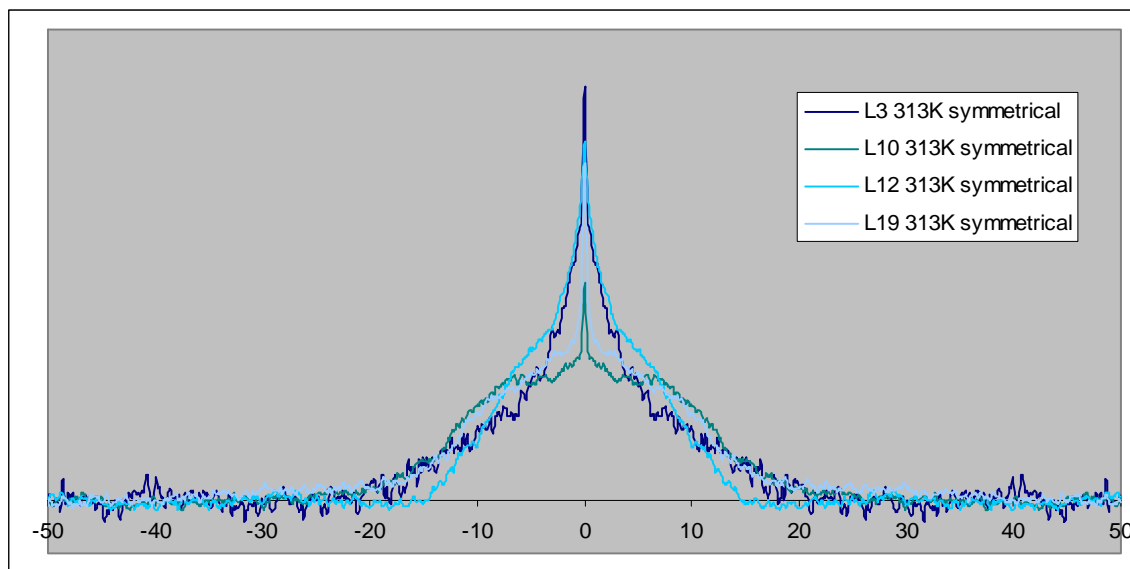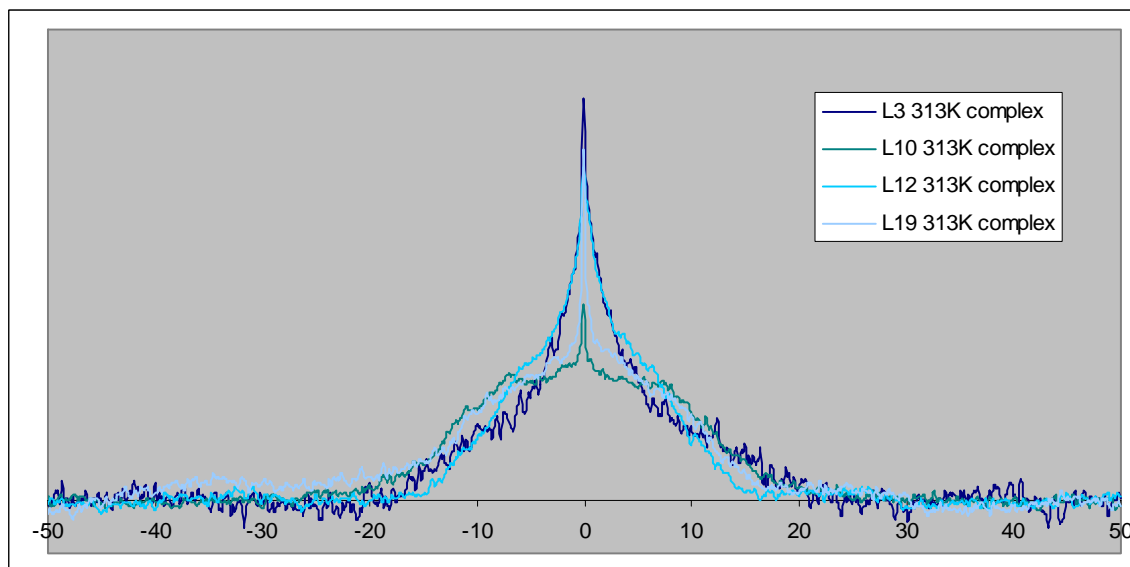

DPPC/POPG Samples, 298 K

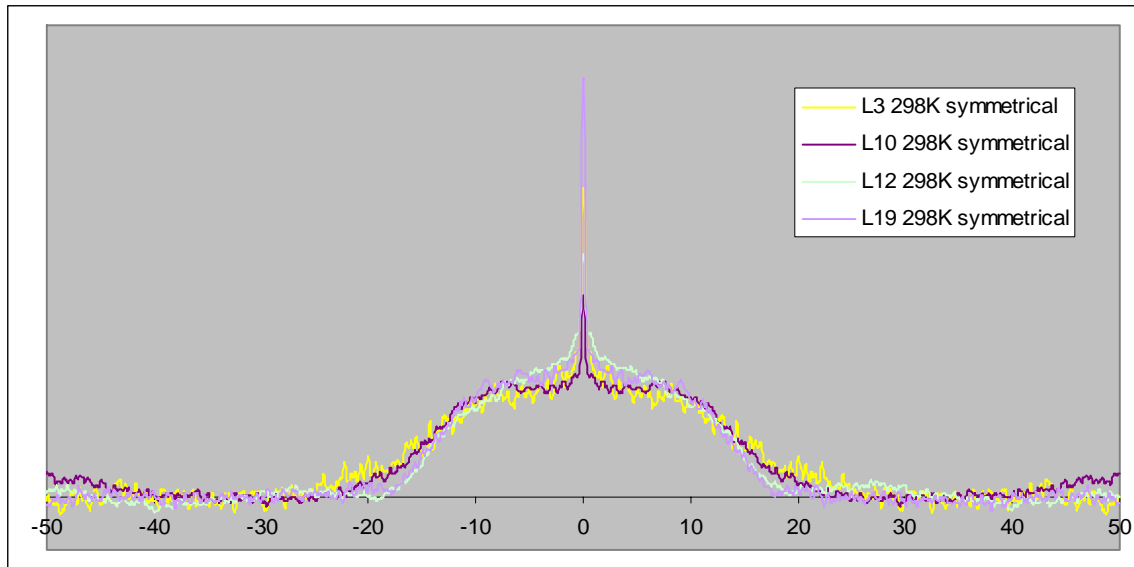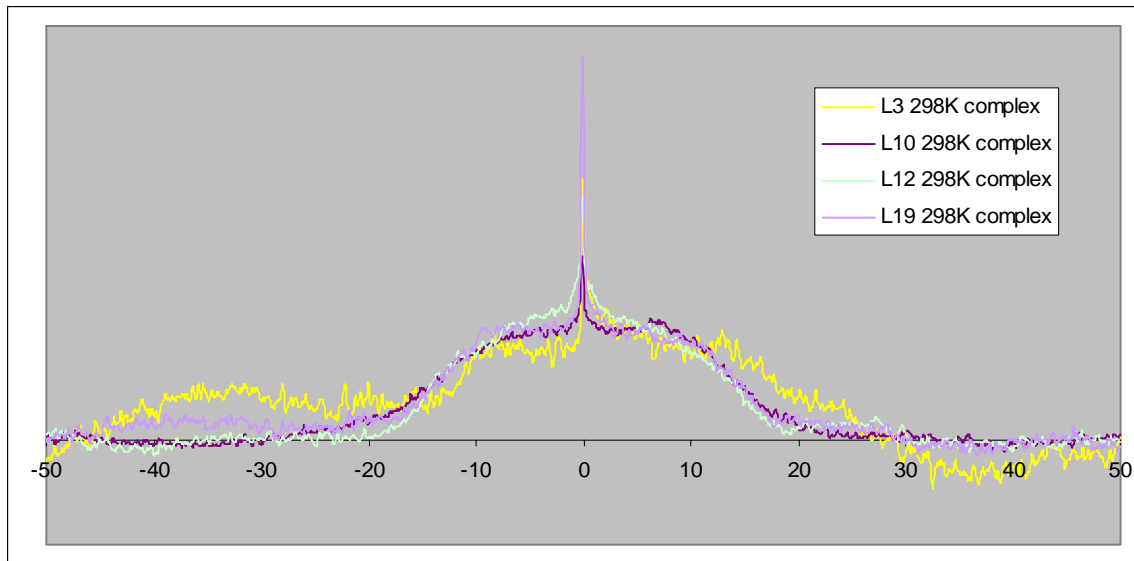

# POPC/POPG Samples, 313 K

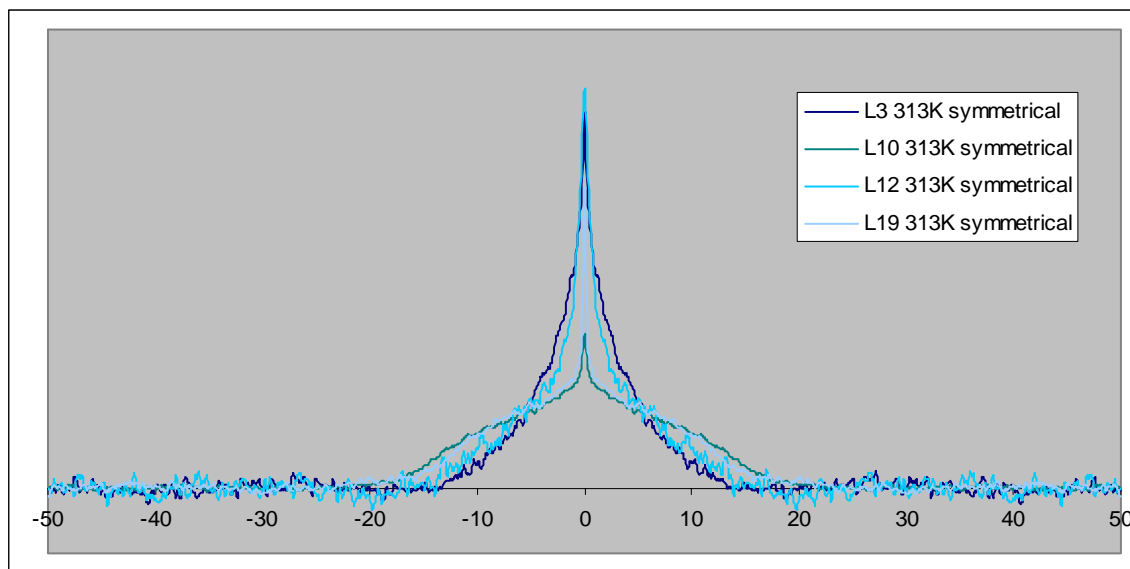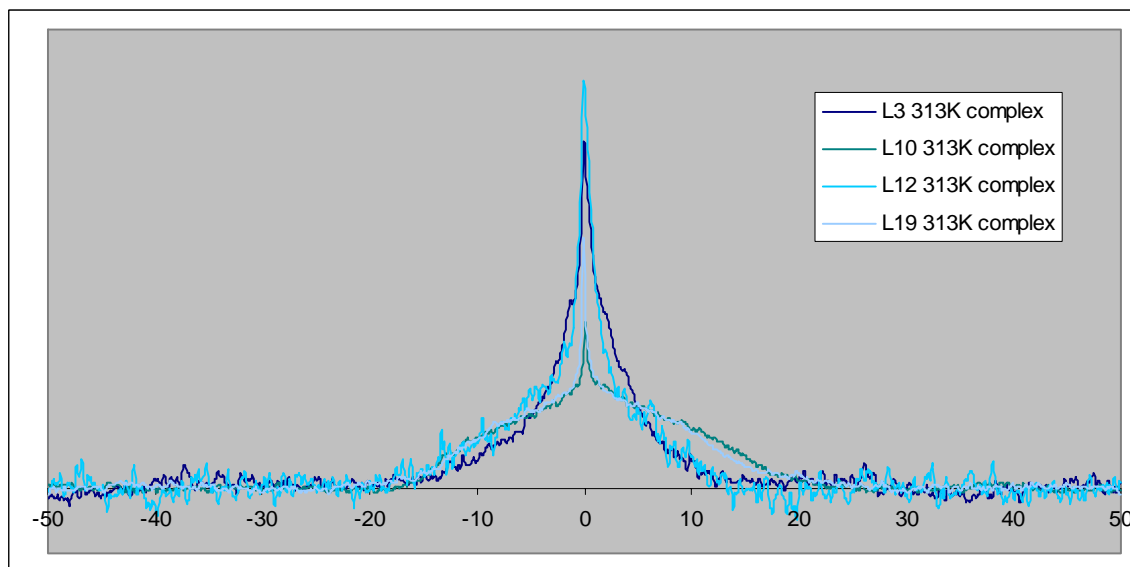

POPC/POPG Samples, 298 K

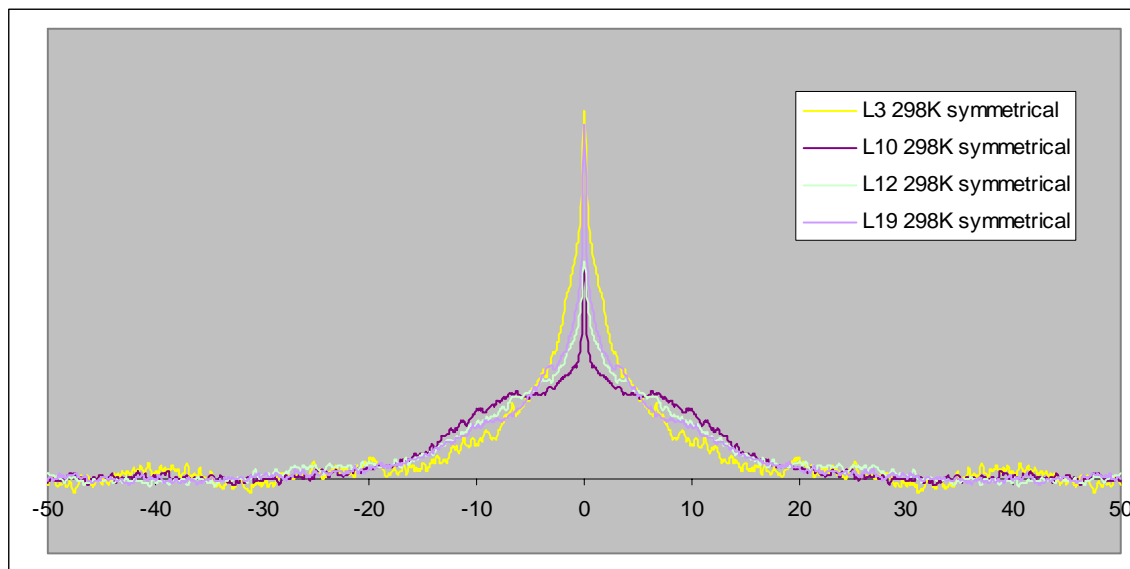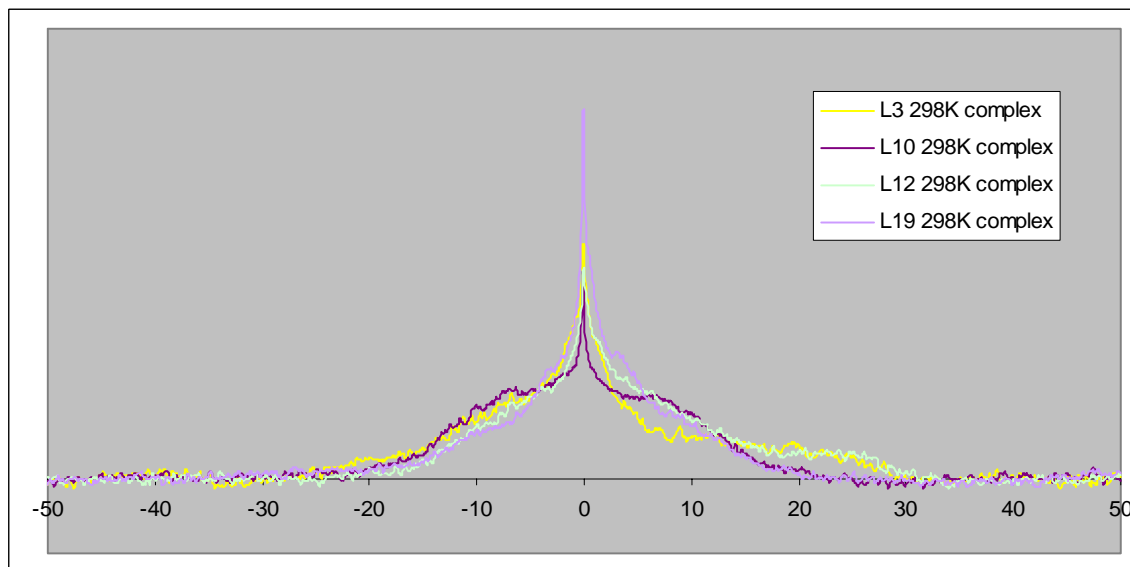

POPC/POPG Samples, 273 K

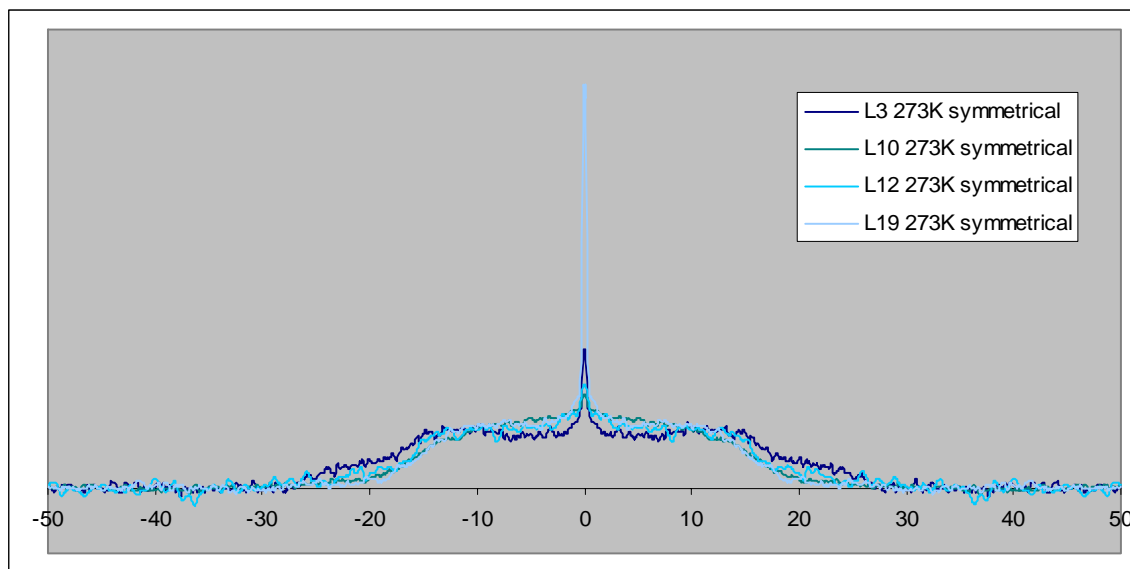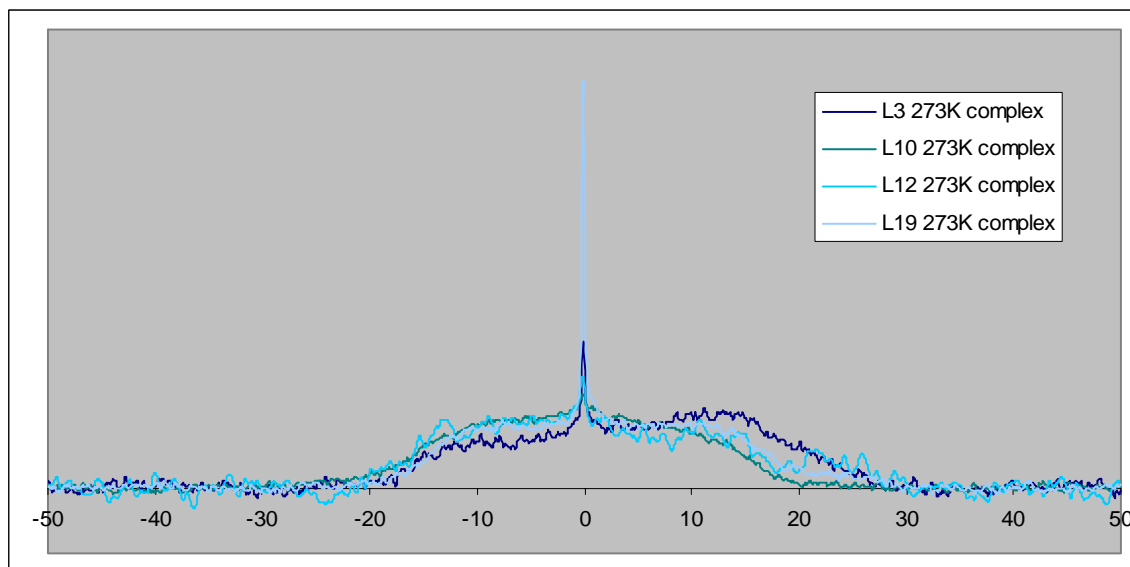

POPC/POPG Samples, 263 K

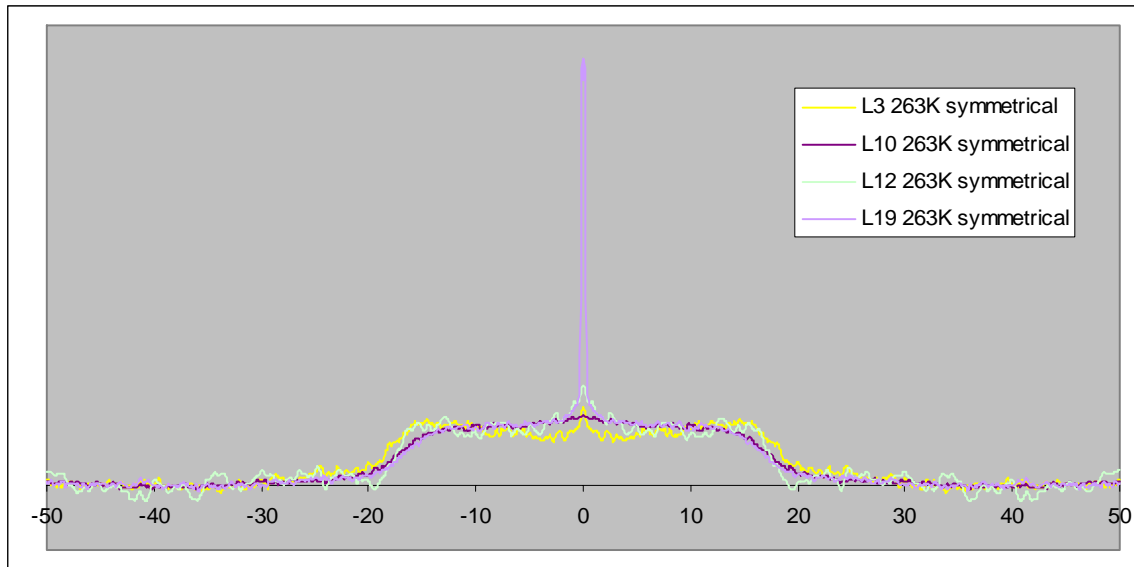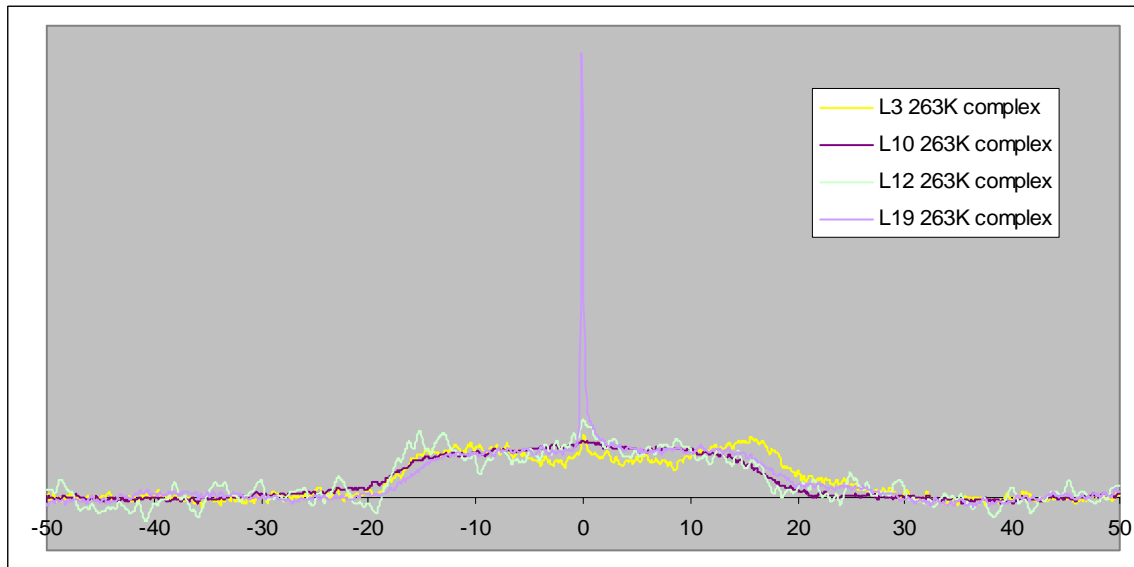

Supplement: NIHMS145187-supplement-01.pdf [file NIHMS145187-supplement-01.pdf]
